# Supplementary material
Source: PubMed Central journal article supplement (PMC5668176)

**Supplementary Figure 1. FACS analysis of cells with Rb or p53 depletion.**

(A and B) FACS analysis of Propidium iodide (PI) staining in indicated cell lines to quantify the percentage of hyperploid cells. Quantification of hyperploid cells is based on cells with more than 4n DNA content.

(C) FACS analysis of BrdU and PI staining in indicated cell lines treated with or without 1  $\mu$ M Palbociclib (Palbo) to quantify the percentage of cells in S phase. Quantification of S phase cells is based on cells that are BrdU positive.

Supplementary Figure 1. Yang et al.

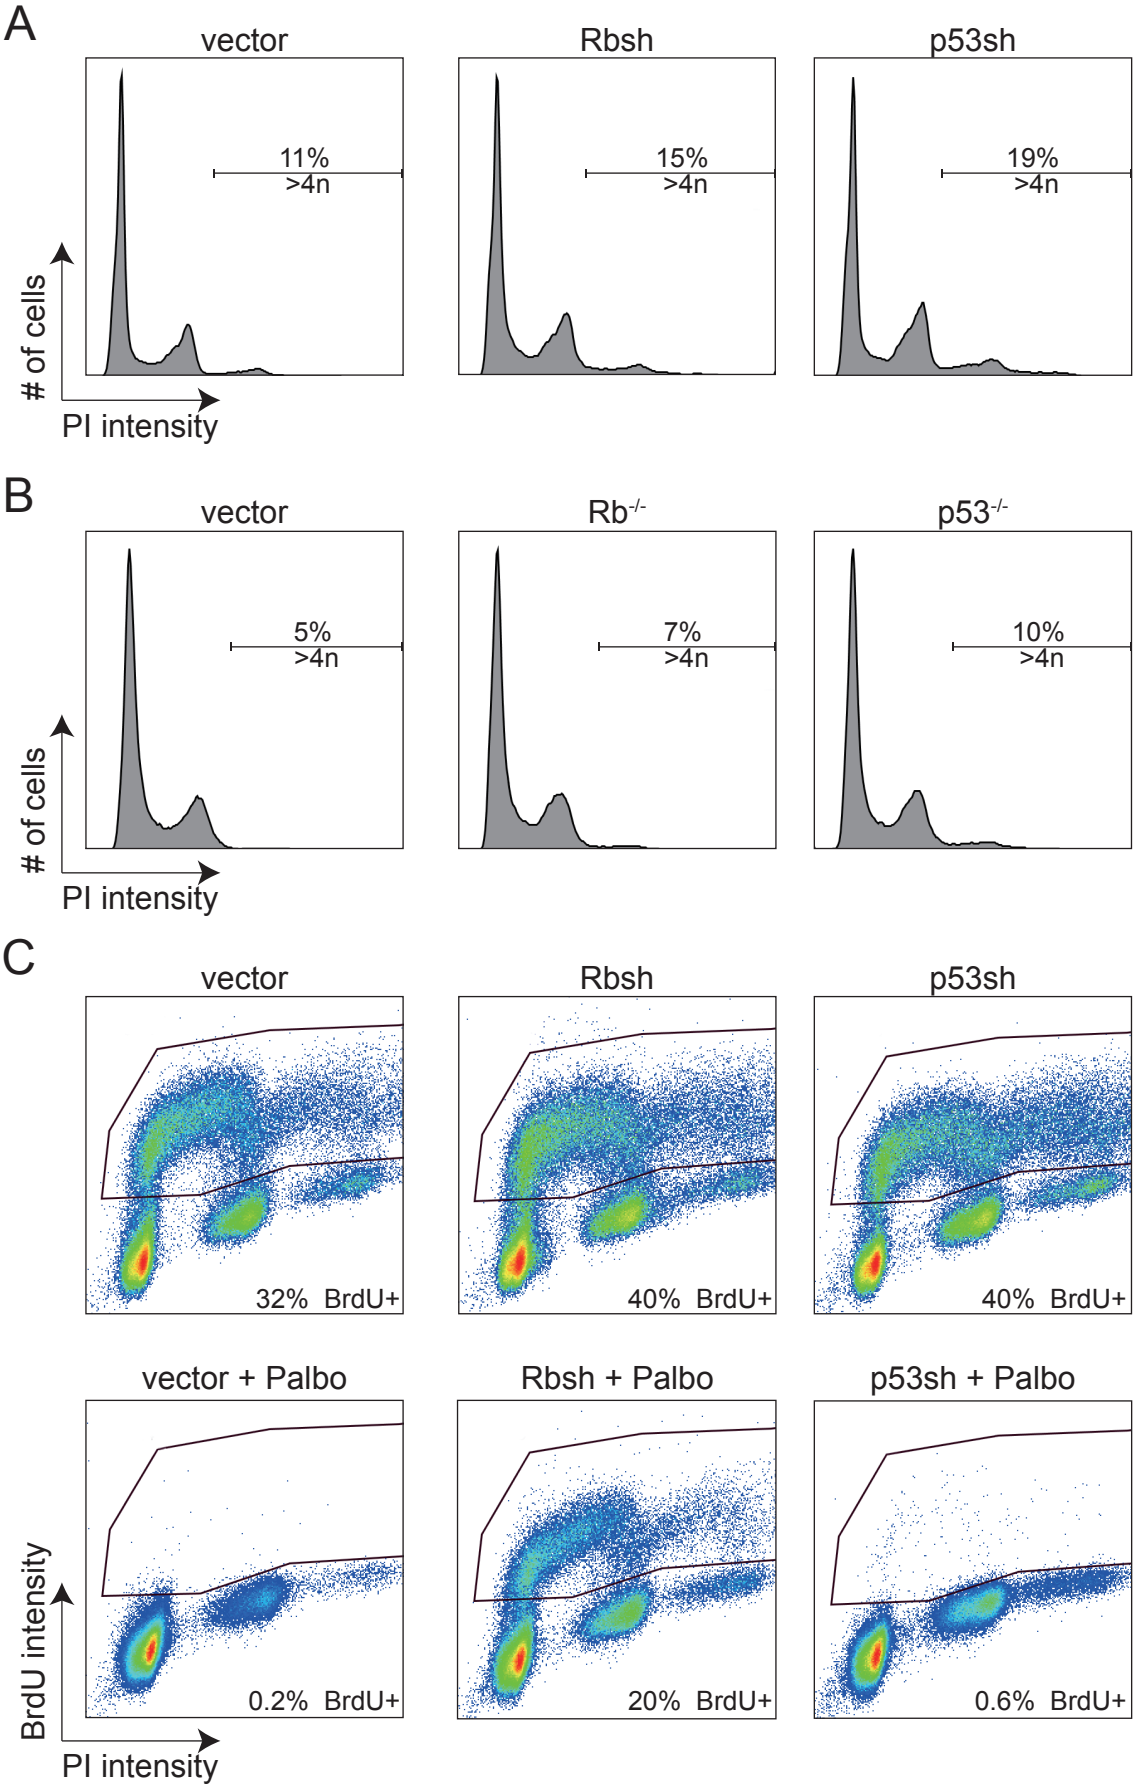

Supplement: NIHMS900686-supplement-1.pdf [file NIHMS900686-supplement-1.pdf]
